# Supplementary material
Source: publisher figshare collection journal article supplement (https://plos.figshare.com/ndownloader/files/31078719)
Supplement: Supplementary file [file 31078719]

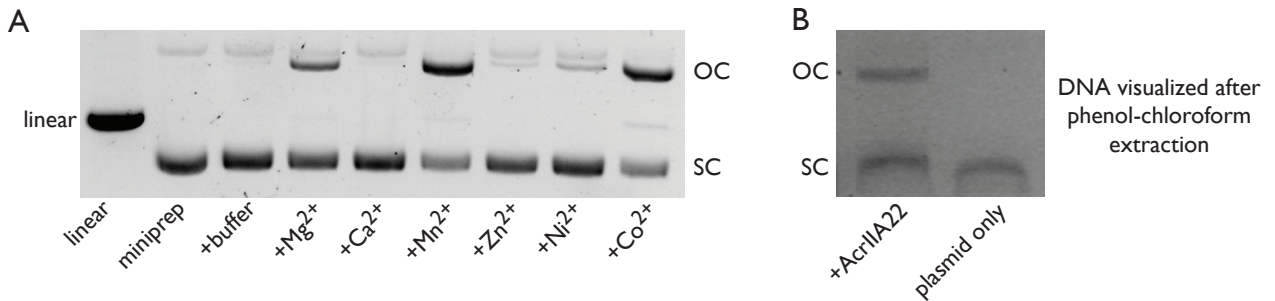

**S11 Fig. Divalent cations influence AcrIIA22's nicking activity.** (A) We present the impact of different divalent cations on AcrIIA22's nicking activity, which is highest with Mg<sup>2+</sup>, Mn<sup>2+</sup>, and Co<sup>2+</sup>. OC, open-circle plasmid form. SC, supercoiled plasmid. (B) The open-circle plasmid product persists through phenol-chloroform extraction following AcrIIA22 treatment, indicating that it directly results from AcrIIA22's nicking activity.
